# Supplementary material for: Modifying carbon dots with l-phenylalanine for rapid discrimination of tryptophan enantiomers
Source: Royal Society of Chemistry journal article supplement (doi:10.1039/d4ay00484a), 2024-01-01
Supplement: d4ay00484a1.pdf [file d4ay00484a1.pdf]

## **Supplementary Data**

### **Modify Carbon Dots with L-Phenylalanine for Rapid Discriminating Tryptophan Enantiomers**

**Bozhi Lang<sup>1</sup>, Wenming Ma<sup>1</sup>, Xuan Liao<sup>1</sup>, Yaning Duan<sup>1</sup>, Cuiling**

**Ren<sup>1,2,\*</sup>, Hongli Chen<sup>1</sup>**

1 State Key Laboratory of Applied Organic Chemistry, College of Chemistry and Chemical Engineering, Lanzhou University, Lanzhou 730000, P. R. China.

2 Key Laboratory of Special Function Materials and Structure Design (MOE), Lanzhou University, Lanzhou 730000, China.

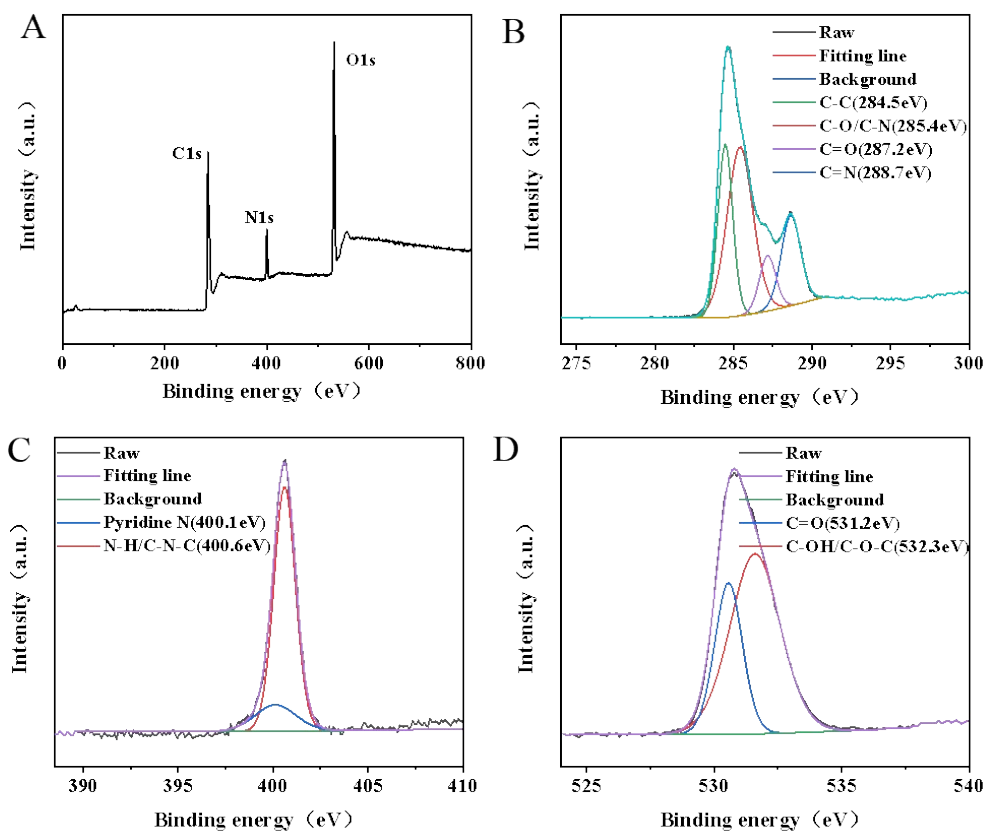

Fig. S1 XPS wide spectrum (A), high resolution XPS spectra of C1s (B), N1s (C) and

O1s (D) of the original CDs

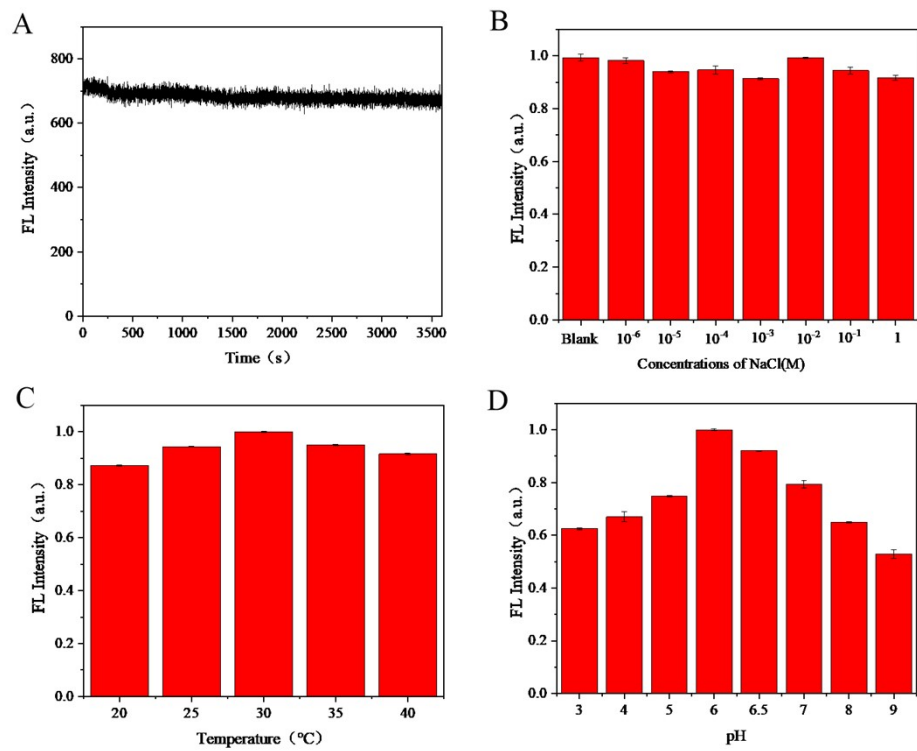

Fig. S2 FL intensity of the L-PCDs as a function of illumination time (A), concentrations of NaCl (B), temperature (C) and pH (D) ( $\lambda_{\text{ex}}=380$  nm).

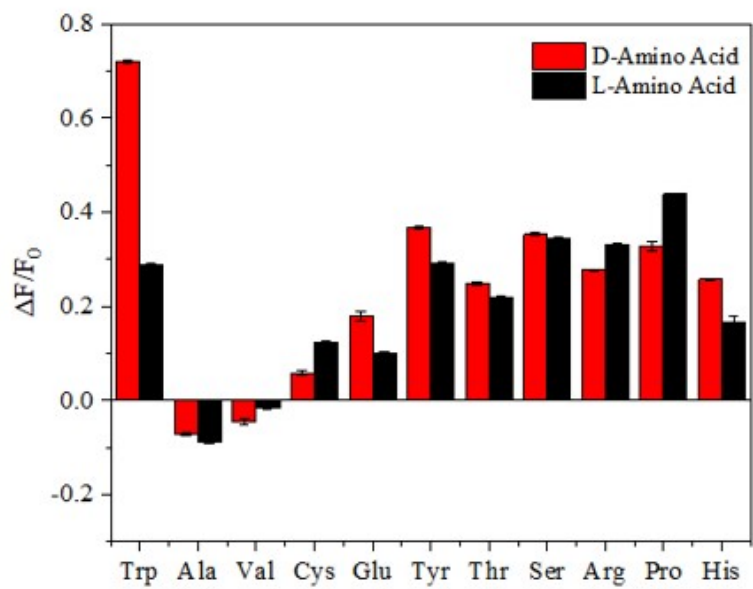

Fig. S3 Enantiomeric responses of L-PCDs to common amino acids.

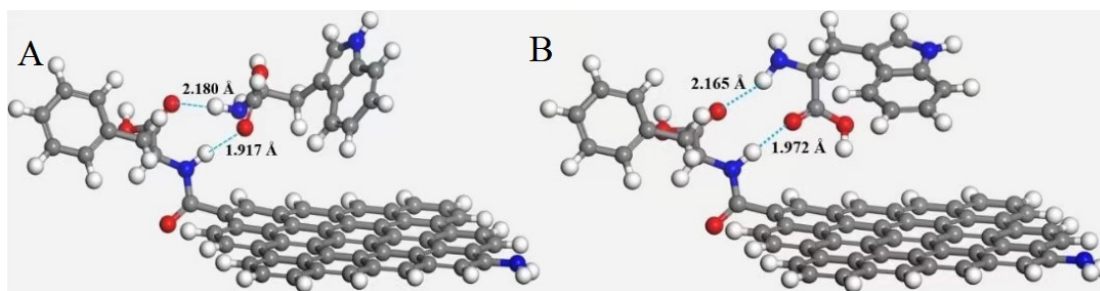

Fig. S4 The combined model optimized L-PCDs with D-Trp (A), L-Trp (B)

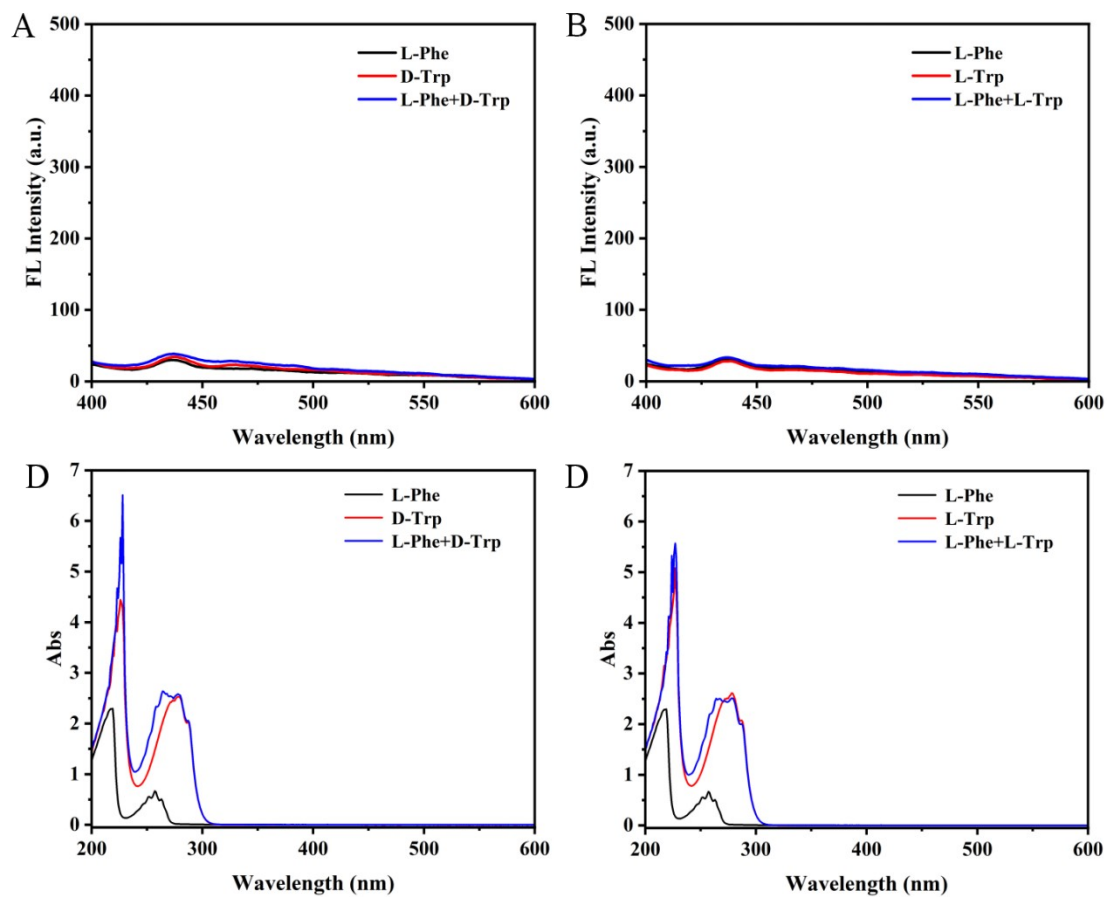

Fig. S5 FL spectra of L-Phe, D-Trp and L-Phe + D-Trp (A), L-Phe, L-Trp and L-Phe + L-Trp (B), UV-Vis spectra of L-Phe, D-Trp and L-Phe + D-Trp (C), and L-Phe, L-Trp and L-Phe + L-Trp (D).

Table S1 Elemental composition of L-PCDs and original CDs

|                     | <b>C%</b>    | <b>N%</b>    | <b>O%</b>    |
|---------------------|--------------|--------------|--------------|
| <b>L-PCDs</b>       | <b>78.58</b> | <b>11.62</b> | <b>9.81</b>  |
| <b>original CDs</b> | <b>67.21</b> | <b>7.02</b>  | <b>25.59</b> |
